# Supplementary material
Source: ML conference proceedings conference paper supplement (https://openaccess.thecvf.com/content/CVPR2023/html/Lin_Multimodality_Helps_Unimodality_CVPR_2023_paper.html)
Supplement: Supplementary file 1 [file Lin_Multimodality_Helps_Unimodality_CVPR_2023_supplemental.zip]

Archive with 122 entries (118 files):
- supplemental/
- __MACOSX/._supplemental
- supplemental/.DS_Store
- __MACOSX/supplemental/._.DS_Store
- supplemental/sample_data_(imagenet-esc)/
- __MACOSX/supplemental/._sample_data_(imagenet-esc)
- supplemental/appendix.pdf
- __MACOSX/supplemental/._appendix.pdf
- supplemental/sample_data_(imagenet-esc)/.DS_Store
- __MACOSX/supplemental/sample_data_(imagenet-esc)/._.DS_Store
- supplemental/sample_data_(imagenet-esc)/images/
- __MACOSX/supplemental/sample_data_(imagenet-esc)/._images
- supplemental/sample_data_(imagenet-esc)/audio/
- __MACOSX/supplemental/sample_data_(imagenet-esc)/._audio
- supplemental/sample_data_(imagenet-esc)/images/25_water_jug.jpg
- __MACOSX/supplemental/sample_data_(imagenet-esc)/images/._25_water_jug.jpg
- supplemental/sample_data_(imagenet-esc)/images/4_otterhound.jpg
- __MACOSX/supplemental/sample_data_(imagenet-esc)/images/._4_otterhound.jpg
- supplemental/sample_data_(imagenet-esc)/images/22_toilet_seat.jpg
- __MACOSX/supplemental/sample_data_(imagenet-esc)/images/._22_toilet_seat.jpg
- supplemental/sample_data_(imagenet-esc)/images/23_sink.jpg
- __MACOSX/supplemental/sample_data_(imagenet-esc)/images/._23_sink.jpg
- supplemental/sample_data_(imagenet-esc)/images/19_can_opener.jpg
- __MACOSX/supplemental/sample_data_(imagenet-esc)/images/._19_can_opener.jpg
- supplemental/sample_data_(imagenet-esc)/images/1_hen.jpeg
- __MACOSX/supplemental/sample_data_(imagenet-esc)/images/._1_hen.jpeg
- supplemental/sample_data_(imagenet-esc)/images/5_egyptian_cat.jpg
- __MACOSX/supplemental/sample_data_(imagenet-esc)/images/._5_egyptian_cat.jpg
- supplemental/sample_data_(imagenet-esc)/images/24_water_bottle.jpg
- __MACOSX/supplemental/sample_data_(imagenet-esc)/images/._24_water_bottle.jpg
- supplemental/sample_data_(imagenet-esc)/images/14_digital_clock.jpg
- __MACOSX/supplemental/sample_data_(imagenet-esc)/images/._14_digital_clock.jpg
- supplemental/sample_data_(imagenet-esc)/images/13_computer_keyboard.jpg
- __MACOSX/supplemental/sample_data_(imagenet-esc)/images/._13_computer_keyboard.jpg
- supplemental/sample_data_(imagenet-esc)/images/11_high-speed_train.jpg
- __MACOSX/supplemental/sample_data_(imagenet-esc)/images/._11_high-speed_train.jpg
- supplemental/sample_data_(imagenet-esc)/images/18_washing_machine.jpg
- __MACOSX/supplemental/sample_data_(imagenet-esc)/images/._18_washing_machine.jpg
- supplemental/sample_data_(imagenet-esc)/images/9_big-horn_sheep.jpg
- __MACOSX/supplemental/sample_data_(imagenet-esc)/images/._9_big-horn_sheep.jpg
- supplemental/sample_data_(imagenet-esc)/images/21_fire_screen.jpg
- __MACOSX/supplemental/sample_data_(imagenet-esc)/images/._21_fire_screen.jpg
- supplemental/sample_data_(imagenet-esc)/images/12_chainsaw.jpg
- __MACOSX/supplemental/sample_data_(imagenet-esc)/images/._12_chainsaw.jpg
- supplemental/sample_data_(imagenet-esc)/images/10_airliner.jpg
- __MACOSX/supplemental/sample_data_(imagenet-esc)/images/._10_airliner.jpg
- supplemental/sample_data_(imagenet-esc)/images/16_vacuum_cleaner.jpg
- __MACOSX/supplemental/sample_data_(imagenet-esc)/images/._16_vacuum_cleaner.jpg
- supplemental/sample_data_(imagenet-esc)/images/15_computer_mouse.jpg
- __MACOSX/supplemental/sample_data_(imagenet-esc)/images/._15_computer_mouse.jpg
- supplemental/sample_data_(imagenet-esc)/images/6_fly.jpg
- __MACOSX/supplemental/sample_data_(imagenet-esc)/images/._6_fly.jpg
- supplemental/sample_data_(imagenet-esc)/images/7_cricket.jpg
- __MACOSX/supplemental/sample_data_(imagenet-esc)/images/._7_cricket.jpg
- supplemental/sample_data_(imagenet-esc)/images/0_rooster.jpg
- __MACOSX/supplemental/sample_data_(imagenet-esc)/images/._0_rooster.jpg
- supplemental/sample_data_(imagenet-esc)/images/2_chickadee.jpg
- __MACOSX/supplemental/sample_data_(imagenet-esc)/images/._2_chickadee.jpg
- supplemental/sample_data_(imagenet-esc)/images/20_church.jpg
- __MACOSX/supplemental/sample_data_(imagenet-esc)/images/._20_church.jpg
- supplemental/sample_data_(imagenet-esc)/images/26_sandbar.jpg
- __MACOSX/supplemental/sample_data_(imagenet-esc)/images/._26_sandbar.jpg
- supplemental/sample_data_(imagenet-esc)/images/3_tree_frog.jpg
- __MACOSX/supplemental/sample_data_(imagenet-esc)/images/._3_tree_frog.jpg
- supplemental/sample_data_(imagenet-esc)/images/17_wall_clock.jpg
- __MACOSX/supplemental/sample_data_(imagenet-esc)/images/._17_wall_clock.jpg
- supplemental/sample_data_(imagenet-esc)/images/8_pig.jpg
- __MACOSX/supplemental/sample_data_(imagenet-esc)/images/._8_pig.jpg
- supplemental/sample_data_(imagenet-esc)/audio/5_cat.wav
- __MACOSX/supplemental/sample_data_(imagenet-esc)/audio/._5_cat.wav
- supplemental/sample_data_(imagenet-esc)/audio/16_vacuum-cleaner.wav
- __MACOSX/supplemental/sample_data_(imagenet-esc)/audio/._16_vacuum-cleaner.wav
- supplemental/sample_data_(imagenet-esc)/audio/25_pouring-water.wav
- __MACOSX/supplemental/sample_data_(imagenet-esc)/audio/._25_pouring-water.wav
- supplemental/sample_data_(imagenet-esc)/audio/1_hen.wav
- __MACOSX/supplemental/sample_data_(imagenet-esc)/audio/._1_hen.wav
- supplemental/sample_data_(imagenet-esc)/audio/17_clock-tick.wav
- __MACOSX/supplemental/sample_data_(imagenet-esc)/audio/._17_clock-tick.wav
- supplemental/sample_data_(imagenet-esc)/audio/6_insects.wav
- __MACOSX/supplemental/sample_data_(imagenet-esc)/audio/._6_insects.wav
- supplemental/sample_data_(imagenet-esc)/audio/15_mouse-click.wav
- __MACOSX/supplemental/sample_data_(imagenet-esc)/audio/._15_mouse-click.wav
- supplemental/sample_data_(imagenet-esc)/audio/22_toilet-flush.wav
- __MACOSX/supplemental/sample_data_(imagenet-esc)/audio/._22_toilet-flush.wav
- supplemental/sample_data_(imagenet-esc)/audio/21_crackling-fire.wav
- __MACOSX/supplemental/sample_data_(imagenet-esc)/audio/._21_crackling-fire.wav
- supplemental/sample_data_(imagenet-esc)/audio/3_frog.wav
- __MACOSX/supplemental/sample_data_(imagenet-esc)/audio/._3_frog.wav
- supplemental/sample_data_(imagenet-esc)/audio/2_chirping-birds.wav
- __MACOSX/supplemental/sample_data_(imagenet-esc)/audio/._2_chirping-birds.wav
- supplemental/sample_data_(imagenet-esc)/audio/0_rooster.wav
- __MACOSX/supplemental/sample_data_(imagenet-esc)/audio/._0_rooster.wav
- supplemental/sample_data_(imagenet-esc)/audio/11_train.wav
- __MACOSX/supplemental/sample_data_(imagenet-esc)/audio/._11_train.wav
- supplemental/sample_data_(imagenet-esc)/audio/23_water-drops.wav
- __MACOSX/supplemental/sample_data_(imagenet-esc)/audio/._23_water-drops.wav
- supplemental/sample_data_(imagenet-esc)/audio/14_clock_alarm.wav
- __MACOSX/supplemental/sample_data_(imagenet-esc)/audio/._14_clock_alarm.wav
- supplemental/sample_data_(imagenet-esc)/audio/9_sheep.wav
- __MACOSX/supplemental/sample_data_(imagenet-esc)/audio/._9_sheep.wav
- supplemental/sample_data_(imagenet-esc)/audio/8_pig.wav
- __MACOSX/supplemental/sample_data_(imagenet-esc)/audio/._8_pig.wav
- supplemental/sample_data_(imagenet-esc)/audio/4_dog.wav
- __MACOSX/supplemental/sample_data_(imagenet-esc)/audio/._4_dog.wav
- supplemental/sample_data_(imagenet-esc)/audio/12_chainsaw.wav
- __MACOSX/supplemental/sample_data_(imagenet-esc)/audio/._12_chainsaw.wav
- supplemental/sample_data_(imagenet-esc)/audio/18_washing-machine.wav
- __MACOSX/supplemental/sample_data_(imagenet-esc)/audio/._18_washing-machine.wav
- supplemental/sample_data_(imagenet-esc)/audio/26_sea-waves.wav
- __MACOSX/supplemental/sample_data_(imagenet-esc)/audio/._26_sea-waves.wav
- supplemental/sample_data_(imagenet-esc)/audio/20_church-bells.wav
- __MACOSX/supplemental/sample_data_(imagenet-esc)/audio/._20_church-bells.wav
- supplemental/sample_data_(imagenet-esc)/audio/13_keyboard_typing.wav
- __MACOSX/supplemental/sample_data_(imagenet-esc)/audio/._13_keyboard_typing.wav
- supplemental/sample_data_(imagenet-esc)/audio/10_airplane.wav
- __MACOSX/supplemental/sample_data_(imagenet-esc)/audio/._10_airplane.wav
- supplemental/sample_data_(imagenet-esc)/audio/19_can_opening.wav
- __MACOSX/supplemental/sample_data_(imagenet-esc)/audio/._19_can_opening.wav
- supplemental/sample_data_(imagenet-esc)/audio/7_crickets.wav
- __MACOSX/supplemental/sample_data_(imagenet-esc)/audio/._7_crickets.wav
- supplemental/sample_data_(imagenet-esc)/audio/24_drinking-sipping.wav
- __MACOSX/supplemental/sample_data_(imagenet-esc)/audio/._24_drinking-sipping.wav
