# Supplementary material
Source: ML conference proceedings conference paper supplement (https://openaccess.thecvf.com/content/CVPR2023/html/Lin_Multimodality_Helps_Unimodality_CVPR_2023_paper.html)

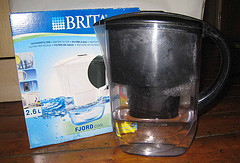

Supplement: Supplementary file 1 [file Lin_Multimodality_Helps_Unimodality_CVPR_2023_supplemental.zip › supplemental/sample_data_(imagenet-esc)/images/25_water_jug.jpg]

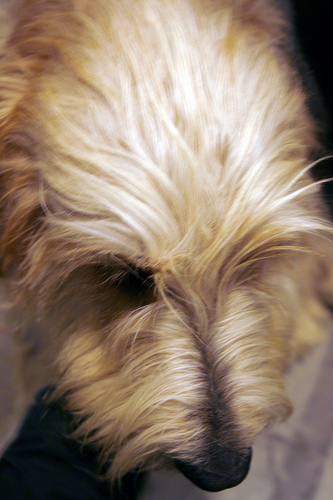

Supplement: Supplementary file 1 [file Lin_Multimodality_Helps_Unimodality_CVPR_2023_supplemental.zip › supplemental/sample_data_(imagenet-esc)/images/4_otterhound.jpg]

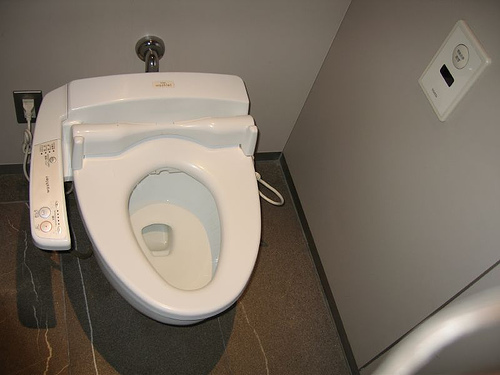

Supplement: Supplementary file 1 [file Lin_Multimodality_Helps_Unimodality_CVPR_2023_supplemental.zip › supplemental/sample_data_(imagenet-esc)/images/22_toilet_seat.jpg]

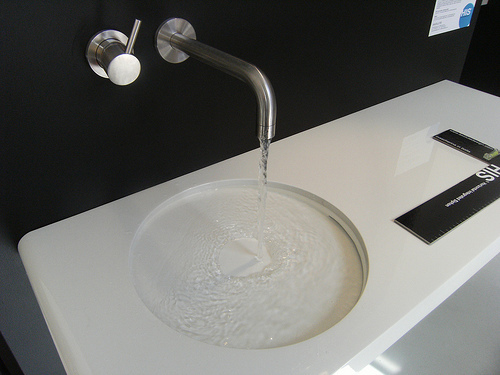

Supplement: Supplementary file 1 [file Lin_Multimodality_Helps_Unimodality_CVPR_2023_supplemental.zip › supplemental/sample_data_(imagenet-esc)/images/23_sink.jpg]

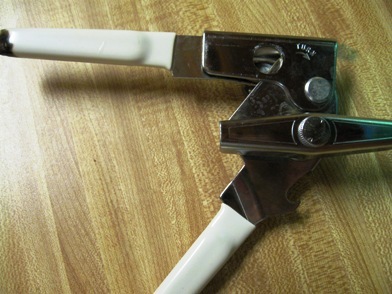

Supplement: Supplementary file 1 [file Lin_Multimodality_Helps_Unimodality_CVPR_2023_supplemental.zip › supplemental/sample_data_(imagenet-esc)/images/19_can_opener.jpg]

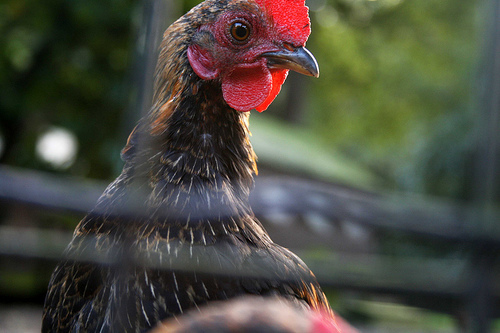

Supplement: Supplementary file 1 [file Lin_Multimodality_Helps_Unimodality_CVPR_2023_supplemental.zip › supplemental/sample_data_(imagenet-esc)/images/1_hen.jpeg]

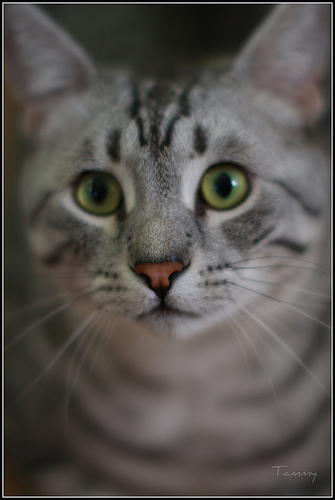

Supplement: Supplementary file 1 [file Lin_Multimodality_Helps_Unimodality_CVPR_2023_supplemental.zip › supplemental/sample_data_(imagenet-esc)/images/5_egyptian_cat.jpg]

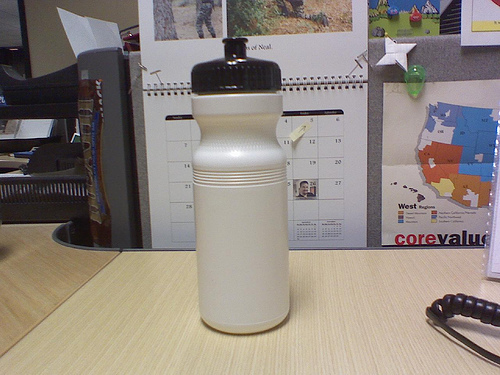

Supplement: Supplementary file 1 [file Lin_Multimodality_Helps_Unimodality_CVPR_2023_supplemental.zip › supplemental/sample_data_(imagenet-esc)/images/24_water_bottle.jpg]

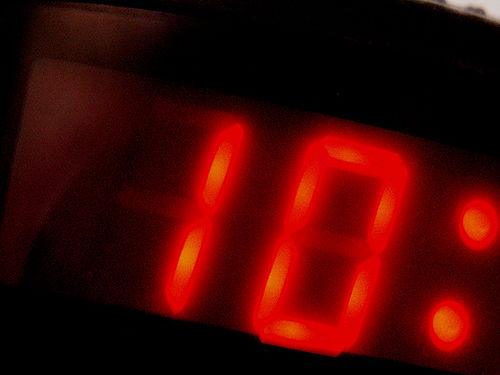

Supplement: Supplementary file 1 [file Lin_Multimodality_Helps_Unimodality_CVPR_2023_supplemental.zip › supplemental/sample_data_(imagenet-esc)/images/14_digital_clock.jpg]

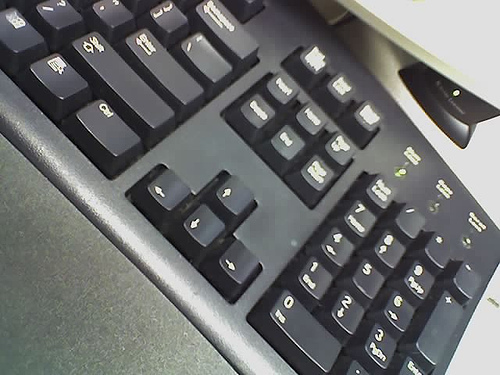

Supplement: Supplementary file 1 [file Lin_Multimodality_Helps_Unimodality_CVPR_2023_supplemental.zip › supplemental/sample_data_(imagenet-esc)/images/13_computer_keyboard.jpg]

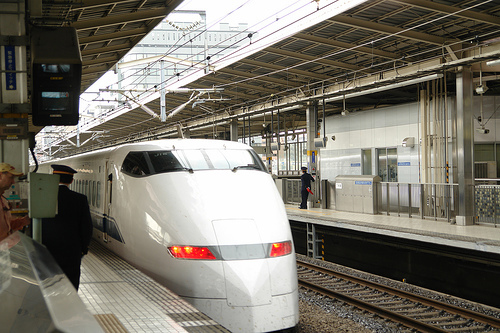

Supplement: Supplementary file 1 [file Lin_Multimodality_Helps_Unimodality_CVPR_2023_supplemental.zip › supplemental/sample_data_(imagenet-esc)/images/11_high-speed_train.jpg]

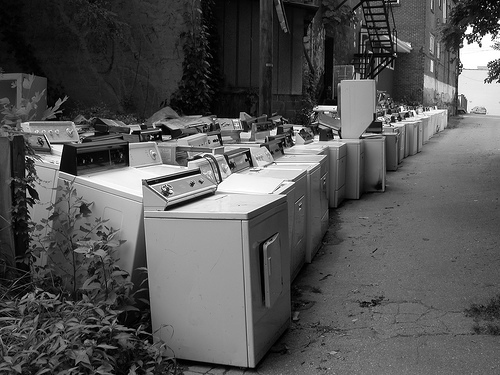

Supplement: Supplementary file 1 [file Lin_Multimodality_Helps_Unimodality_CVPR_2023_supplemental.zip › supplemental/sample_data_(imagenet-esc)/images/18_washing_machine.jpg]

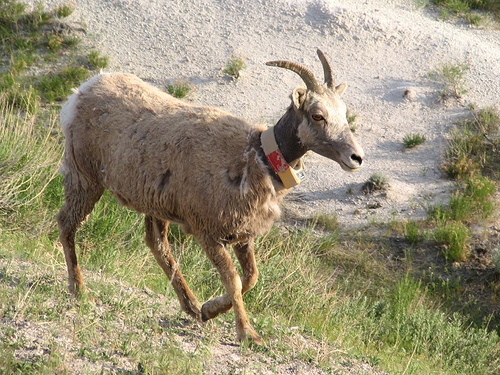

Supplement: Supplementary file 1 [file Lin_Multimodality_Helps_Unimodality_CVPR_2023_supplemental.zip › supplemental/sample_data_(imagenet-esc)/images/9_big-horn_sheep.jpg]

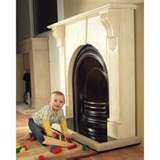

Supplement: Supplementary file 1 [file Lin_Multimodality_Helps_Unimodality_CVPR_2023_supplemental.zip › supplemental/sample_data_(imagenet-esc)/images/21_fire_screen.jpg]

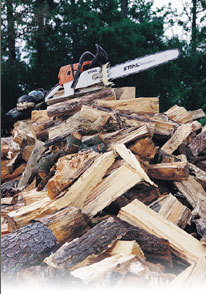

Supplement: Supplementary file 1 [file Lin_Multimodality_Helps_Unimodality_CVPR_2023_supplemental.zip › supplemental/sample_data_(imagenet-esc)/images/12_chainsaw.jpg]

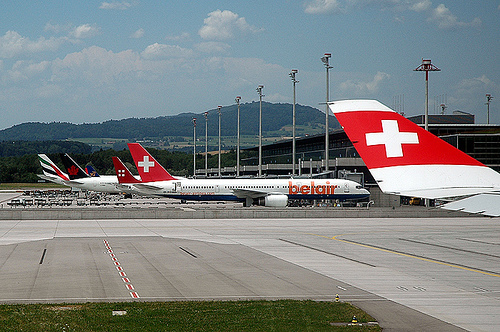

Supplement: Supplementary file 1 [file Lin_Multimodality_Helps_Unimodality_CVPR_2023_supplemental.zip › supplemental/sample_data_(imagenet-esc)/images/10_airliner.jpg]

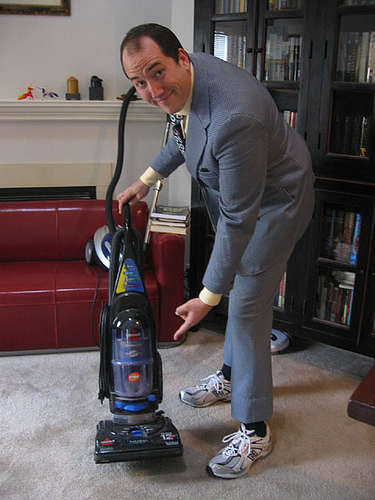

Supplement: Supplementary file 1 [file Lin_Multimodality_Helps_Unimodality_CVPR_2023_supplemental.zip › supplemental/sample_data_(imagenet-esc)/images/16_vacuum_cleaner.jpg]

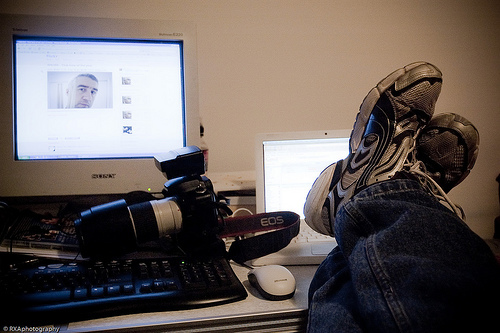

Supplement: Supplementary file 1 [file Lin_Multimodality_Helps_Unimodality_CVPR_2023_supplemental.zip › supplemental/sample_data_(imagenet-esc)/images/15_computer_mouse.jpg]

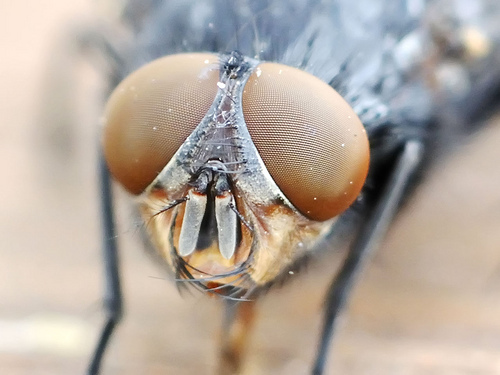

Supplement: Supplementary file 1 [file Lin_Multimodality_Helps_Unimodality_CVPR_2023_supplemental.zip › supplemental/sample_data_(imagenet-esc)/images/6_fly.jpg]

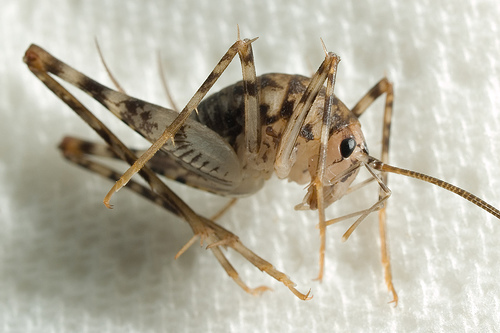

Supplement: Supplementary file 1 [file Lin_Multimodality_Helps_Unimodality_CVPR_2023_supplemental.zip › supplemental/sample_data_(imagenet-esc)/images/7_cricket.jpg]

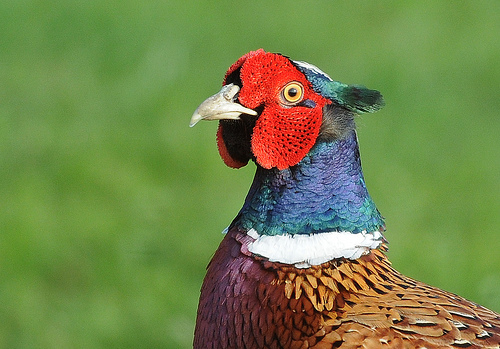

Supplement: Supplementary file 1 [file Lin_Multimodality_Helps_Unimodality_CVPR_2023_supplemental.zip › supplemental/sample_data_(imagenet-esc)/images/0_rooster.jpg]

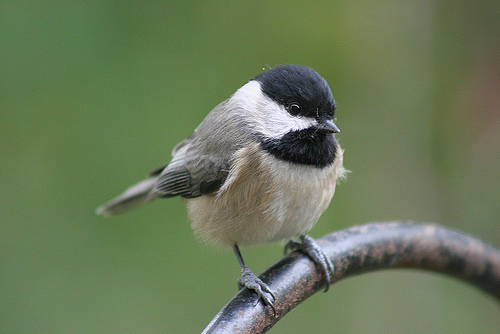

Supplement: Supplementary file 1 [file Lin_Multimodality_Helps_Unimodality_CVPR_2023_supplemental.zip › supplemental/sample_data_(imagenet-esc)/images/2_chickadee.jpg]

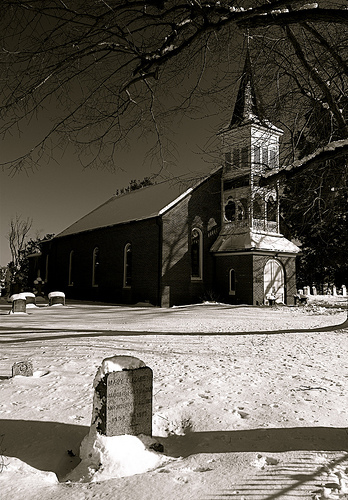

Supplement: Supplementary file 1 [file Lin_Multimodality_Helps_Unimodality_CVPR_2023_supplemental.zip › supplemental/sample_data_(imagenet-esc)/images/20_church.jpg]

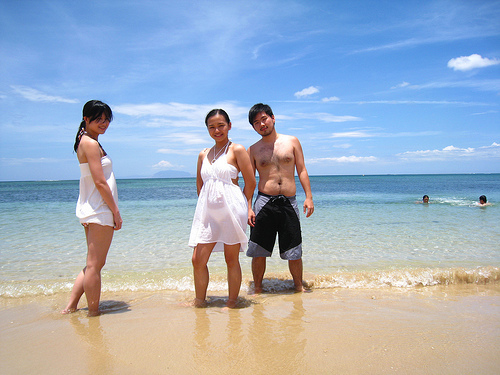

Supplement: Supplementary file 1 [file Lin_Multimodality_Helps_Unimodality_CVPR_2023_supplemental.zip › supplemental/sample_data_(imagenet-esc)/images/26_sandbar.jpg]

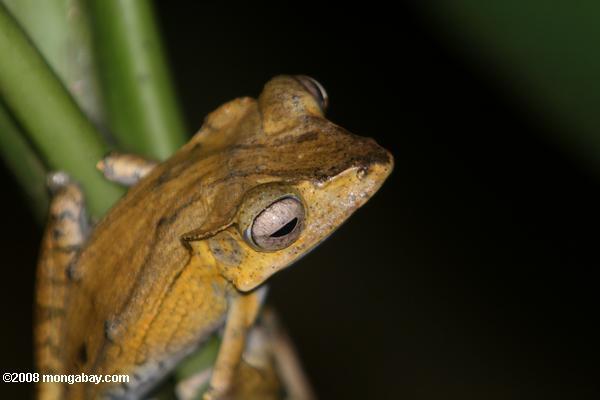

Supplement: Supplementary file 1 [file Lin_Multimodality_Helps_Unimodality_CVPR_2023_supplemental.zip › supplemental/sample_data_(imagenet-esc)/images/3_tree_frog.jpg]

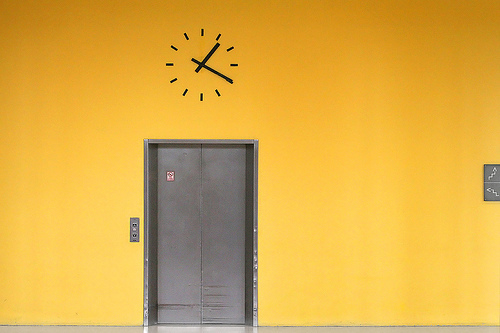

Supplement: Supplementary file 1 [file Lin_Multimodality_Helps_Unimodality_CVPR_2023_supplemental.zip › supplemental/sample_data_(imagenet-esc)/images/17_wall_clock.jpg]

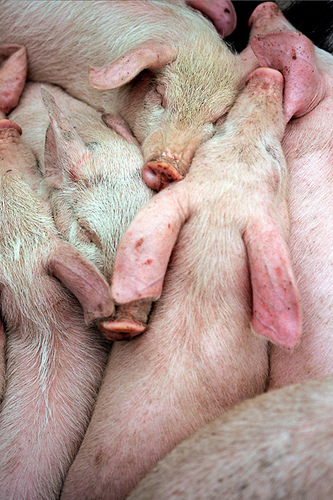

Supplement: Supplementary file 1 [file Lin_Multimodality_Helps_Unimodality_CVPR_2023_supplemental.zip › supplemental/sample_data_(imagenet-esc)/images/8_pig.jpg]
